# Supplementary material
Source: MDPI journal article supplement (https://www.mdpi.com/2571-550X/4/1/8)
Supplement: s1 [file s1]

## Sheet: Plan1
Archaeobotanical Remains from Monte Castelo Shellmound
Cultural Strata	Layer	Charcoal																										Phytoliths (raw count; percentage)
		Total (fragments/ 11 liters)	Wood	%	Seeds and fruits	%	Parenchyma	%	Unidentified	Astrocaryum sp.	cf. Bactris sp.	Attalea sp.	Mauritia flexuosa	Poaceae cf. Zea mays	Poaceae cf. Oryza sp.	Anacardiaceae cf. Anacardium sp.	Anacardium sp.	Annonaceae cf. Annona sp.	Bertholletia excelsa	Theobroma sp.	Byrsonima sp.	Moraceae cf. Ficus sp.1	Moraceae cf. Ficus sp.2	Myrtaceae cf. Psidium sp.	Rosaceae cf. Prumus sp.	Fabaceae sp.1	Fabaceae sp.2	Arundinoideae		Bambusoideae		Chloridoideae		Panicoideae		Non-diagnostic Poaceae		Oryza glume (double-peaked /deeply serrated bodies)		Oryza leaf (cuneiform keystone bulliform and scooped bilobates)		Total grasses (%)	Zea mays wavy-top rondel		Zea mays leaf presence	Cucurbita scalloped sphere		Cyperaceae
Bacabal	A	213	40	18.8	158	74.2	15	7	0										1						1			2	1	4	2	10	5.25	3	1.75	4	2	37	18.75	8	3.75	34.5	1	1	0	8	3.75	2	1
	B	1573	26	1.6	1224	77.8	169	10.7	119		1								4							1		0	0	10	5.08906	1	0.508906	2	1.01781	10	4.83461	38	19.3384	4	2.29008	33.0789	2	1	1	6	3.05344	5	2.29008
	C	2051	39	1.9	1913	93.2	50	2.4	49						2	3			1	1		61	18				1	1	1	8	3.44828	1	0.265252	4	2.12202	16	7.69231	44	21.4854	6	2.91777	38.931	2	1	1	6	2.91777	18	8.75332
	D	1130	44	3.9	991	87.7	89	7.9	40	1				1			4		3			6	12					4	1	35	6.12813	10	0.278552	26	3.06407	23	4.17827	61	11.6992	21	4.17827	30.5265	3	1	1	20	7.52089	64	10.585
Bacabal - Sinimbu transition	E	162	28	17.3	117	72.2	19	11.7	0																			2	1	10	5.52764	3	1.75879	6	3.01508	7	3.51759	13	6.78392	7	3.76885	25.3719	2	1	1	2	1.00503	13	6.78392
	F	54	21	38.9	20	37	13	24	0																			2	1	14	7.52351	1	0.626959	10	5.32915	7	4.07524	14	7.83699	3	1.5674	27.9592	1	1	1	7	4.07524	23	12.8527
	G	3	1	33.3	0	0	2	66.6	0																			0	0	9	5.42857	2	1.14286	7	4	8	4.57143	8	4.85714	9	5.42857	25.4286	0	0	0	2	1.14286	40	23.1429
	H	432	36	8.3	204	47.2	26	6	26										2		1							2	1	17	8.87574	2	1.18343	10	5.02959	17	8.87574	12	6.21302	7	3.84615	35.0237	2	1	1	3	1.77515	31	16.568
	I	1293	13	1.1	740	57.2	19	1.5	0	2																		1	1	11	6.64557	1	0.316456	12	6.96203	14	8.5443	6	3.48101	4	2.21519	29.1646	1	1	1	1	0.949367	26	15.5063
Sinumbu	J	1286	17	1.6	1248	97	21	1.6	0	8			1					1			2			2				4	1.04	58	5.53746	10	2.60586	135	21.1726	70	7.81759	34	5.53746	25	2.93159	45.6026	4	1	1	5	0.651466	115	16.2866
	K	640	37	5.8	606	94.7	12	1.9	7				2						1									0	0	0	0	4	1.9802	13	6.43564	83	41.0891	1	1.14286	0	0	49.505	1	0.5	0	0	0	0	0
	L	164	6	3.6	149	90.8	4	2.4	0																			1	2	0	0	1	0.510204	17	8.67347	111	56.6327	0	0	0	0	66.8367	3	1.53	0	0	0	0	0
	M	317	42	13.2	261	82.3	13	4.1	6	4			1															0	0	0	0	2	0.97561	26	12.6829	16	7.80488	0	0	1	0.97561	22.439	1	0.49	1	1	0.487805	1	0.487805
	N	929	18	1.9	833	89.6	86	9.2	0	2									2		1							0	0	0	0	0	0	6	3.0303	12	6.06061	0	0	0	0	9.09091	0	0	0	0	0	0	0
	O	2430	28	1.1	2338	96.2	97	4	2	9		1	1						2		8							0	0	0	0	2	0.943396	7	3.30189	33	15.566	0	0	1	0.471698	20.283	0	0	0	0	0	0	0
	P	2583	4	0.2	1600	85.7	87	4.6	175	7									2		2							0	0	0	0	1	0.492611	8	3.94089	20	9.85222	0	0	1	0.985222	15.2709	0	0	0	1	0.492611	0	0
	Q	1653	5	0.3	1398	84.6	95	5.7	155							1			1							1		1	2	0	0	2	1.02041	9	4.59184	46	23.4694	0	0	0	0	30.102	0	0	0	1	0.510204	0	0
	R	Not analyzed																										0	0	0	0	0	0	5	2.52525	106	53.5354	0	0	0	0	56.0606	0	0	0	0	0	0	0
Cupim	S																											0	0	0	0	0	0	1	0.515464	108	55.6701	0	0	0	0	56.1856	0	0	0	0	0	0	0
	T																											0	0	0	0	0	0	11	5.2381	83	39.5238	0	0	1	0.47619	45.2381	0	0	0	0	0	0	0
	U																											0	0	0	0	2	1.01523	38	19.2893	54	27.4112	0	0	1	1.01523	48.731	0	0	0	0	0	0	0
[truncated: 32 more columns]
